1 **Title:** Prevalence of severe adverse events in health professionals after  
2 receiving the first dose of the COVID-19 vaccination in Togo, March  
3 2021.

4 **Short title:** Prevalence of severe adverse events in health professionals  
5 after the COVID-19 vaccination in Togo, 2021.

6 **Authors:**

7 Yao Rodion KONU <sup>1,2</sup>, Fifonsi Adjidossi GBEASOR-KOMLANVI <sup>1,2</sup>, Mouhoudine  
8 YERIMA <sup>3</sup>, Arnold Junior SADIO <sup>1,2</sup>, Martin Kouame TCHANKONI <sup>2</sup>, Wendpouire Ida  
9 Carine ZIDA-COMPAORE <sup>2</sup>, Josée NAYO-APETSIANYI <sup>4</sup>, Kossivi Agbélénbko  
10 AFANVI <sup>1,4</sup>, Sibabe AGORO <sup>1,4</sup>, Mounerou SALOU <sup>5</sup>, Dadja Essoya LANDOH <sup>6</sup>,  
11 Atany B. NYANSA <sup>3</sup>, Essohanam BOKO<sup>7</sup>, Moustafa MIJIYAWA <sup>4,7</sup>, Didier Koumavi  
12 EKOUEVI <sup>1,2,8</sup> #

- 13 1. Université de Lomé, Département de Santé Publique, Lomé, Togo  
14 2. Centre Africain de Recherche en Epidémiologie et en Santé Publique  
15 (CARESP), Lomé, Togo  
16 3. Ministère de la Santé et de l'Hygiène Publique, Service de pharmacovigilance  
17 Lomé, Togo  
18 4. Ministère de la Santé et de l'Hygiène Publique, Lomé, Togo  
19 5. Université de Lomé, Laboratoire de Biologie Moléculaire et d'Immunologie  
20 (BIOLIM), Lomé Togo  
21 6. World Health Organization (WHO), Country Office of Togo, Lomé, Togo  
22 7. Université de Lomé, Faculté des Sciences de la Santé, Lomé, Togo  
23 8. Centre Inserm, 1219, Institut de Santé Publique et de Développement et  
24 Université de Bordeaux, Bordeaux, France  
25

26 **Corresponding author #**

27 Didier Koumavi EKOUEVI  
28 Université de Lomé  
29 Cell : 00228 9313 6655  
30 Mail : [didier.ekouevi@gmail.com](mailto:didier.ekouevi@gmail.com)  
31

32

33 **Abstract:**

34 **Introduction:** Covid-19 vaccines can cause adverse events (AE) that can lead to  
35 increased hesitation or fear of vaccination. This study aims at estimating the  
36 prevalence of severe adverse events (SAEs) and their associated factors among  
37 health professionals (HPs) vaccinated with COVISHIELD™ vaccine in Togo.

38 **Methods:** A cross-sectional study was conducted from March 13<sup>th</sup> to 19<sup>th</sup>, 2021 in Togo  
39 among HPs who received the first dose of vaccine. An online self-administered  
40 questionnaire was used to collect data on sociodemographic characteristics and  
41 vaccination. SAEs were defined as one resulting in hospitalization, medical  
42 consultation, or inability to work the day following the administration of the vaccine.  
43 Regression analysis were performed to assess factors associated with SAEs.

44 **Results:** A total of 1,639 HP (70.2% male) with a median age [IQR] of 32 years [27-  
45 40] participated. At least one AE was reported among 71.6% (95%CI= [69.3-73.8]).  
46 The most commonly reported AEs were pain at the injection site (91.0%), asthenia  
47 (74.3%), headache (68.7%), soreness (55.0%), and fever (47.5%). An increased libido  
48 was also reported in 3.0% of HP. Among HP who experienced AEs, 18.2% were unable  
49 to go to work the day after vaccination, 10.5% consulted a medical doctor, and 1.0%  
50 were hospitalized. The SAE prevalence was 23.8% (95%CI= [21.8-25.9]). Being <30  
51 years (aOR=5.54; p<0.001), or 30-49 years (aOR=3.62; p<0.001) and being female  
52 (aOR=1.97; p<0.001) were associated with SAEs.

53 **Conclusion:** Despite the occurrence of SAEs, current data collected in Togo about  
54 adverse events are reassuring with COVISHIELD™ vaccine and how they could be  
55 managed.

56 **Keywords:** Severe adverse event, COVID-19, vaccine, prevalence, health  
57 professionals, Togo.

58

59 **Key points:**

- 60
- The prevalence of severe adverse events (SAEs) after COVID-19 vaccination  
61 was high among health professionals in Togo, especially in the youths (under  
62 30years).
  - Despite the occurrence of SAEs, current data collected in Togo about adverse  
63 events are reassuring with COVISHIELD(TM) vaccine and provide information  
64 about how the could be managed.  
65
- 66
- 67
- 68

## 69 **1. Introduction**

70 Coronavirus disease 2019 (COVID-19) was first described in China in December 2019  
71 [1] and resulted in the declaration of a pandemic in January 2020 [2]. As of March 24,  
72 2021, more than 120 million cases of COVID-19 infections, with more than 2 million  
73 deaths, were reported worldwide [3].

74 No cure or vaccine was available until December 2020. Therefore, controlling the  
75 infection to prevent the spread of COVID-19 was considered the only intervention [4].  
76 Several social and public health risk mitigation measures were proposed and  
77 implemented to reduce the spread of the pandemic. These measures include individual  
78 measures (frequent hand hygiene, physical distancing, and use of masks) and physical  
79 and social distancing measures (reduction of mass gatherings, and promotion of  
80 telecommuting) [5].

81 However, given that vaccination has been identified as a relevant intervention for  
82 stopping epidemics and fighting against infectious diseases, research on a COVID-19  
83 vaccine has been promoted. At an early stage of this pandemic, the World Health  
84 Organization (WHO) and the Global Alliance for Vaccines and Immunization (Gavi)  
85 launched a pooled procurement mechanism for new COVID-19 vaccines called the  
86 COVAX Facility to ensure fair, global and equitable access to vaccines [6]. This facility  
87 also aims to end the acute phase of the COVID-19 pandemic by accelerating the  
88 development of safe and effective vaccines against COVID-19 and contributing to the  
89 development of production capacity [7]. The first vaccines received the Emergency  
90 Use Listing from WHO in December 2020 [8].

91 Like many African countries, Togo has joined the COVAX facility and participated in  
92 COVID-19 vaccine procurement process [6]. On March 7, 2021, Togo received the first

93 allocation of 156,000 doses of the SII-AstraZeneca (COVISHIELD™) vaccine [9].  
94 COVISHIELD™ was developed by AstraZeneca and Oxford University and produced  
95 by the Pune-based Serum Institute of India [10]. It is a viral vector vaccine (ChAdOx1-  
96 S) that was approved for emergency use by the WHO [11]. In Togo, the vaccination  
97 campaign was launched on March 10<sup>th</sup>, 2021. According to the National Deployment  
98 and Vaccination Plan for COVID-19 vaccines, the priority target was 35,119 health  
99 professionals (HP) followed by people over 50 years of age and those living with at  
100 least one comorbidity condition (hypertension, diabetes, heart disease etc.) [12]. These  
101 groups were targeted because they are at greater risk of exposure to COVID-19 or  
102 because they have an increased risk of death in case of infection.

103 Vaccination against COVID-19 is an essential pillar for controlling the pandemic in  
104 addition to other infection risk mitigation measures included in test, treat, track (T3)  
105 approach. In Togo, vaccination against COVID-19 is implemented at a time when the  
106 country is experiencing an epidemic peak with more than 600 cases per week since  
107 February 1<sup>st</sup>, 2021 compared to 100 cases per week in December 2020 [13]. As of  
108 March 24<sup>th</sup>, 2021, 9147 COVID-19 infections cases, of which, 105 deaths, have been  
109 reported in Togo [14].

110 Despite the awareness campaign on the importance of vaccination, several factors  
111 contribute to limiting the adherence of the population to this intervention. These  
112 include: i) the relative speed of discovery and availability the of vaccines, ii) the use of  
113 new technologies never before deployed in humans, and iii) the lack of hindsight  
114 regarding the safety of vaccines that are available.

115 As a result, false information has been circulating about these new vaccines and has  
116 contributed to the growing anxiety and vaccine hesitancy associated with a fear of

117 occurrence of long-term adverse events. In addition, the suspension of the  
118 AstraZeneca vaccine in Europe after the occurrence of thrombosis cases has amplified  
119 psychosis with popular pressure to stop the vaccination campaign in Africa including  
120 Togo.

121 On March 11 and 12, Togo conducted a large-scale vaccination program against  
122 COVID-19 for HP and 18,249 were vaccinated [15]. In parallel with the surveillance of  
123 adverse events following immunization which is ensured by the pharmacovigilance  
124 service of the Ministry of Health, this study was launched to quickly document adverse  
125 events to reassure the population. Our objective was to estimate the prevalence of  
126 severe adverse events (SAEs) and their associated factors among HPs in Togo.

127

## 128 **2. Methods**

### 129 ***2.1. Study design and setting***

130 This study was a cross-sectional study that was conducted from March 13 to 19, 2021  
131 in Togo.

132 Togo is a country of West Africa that covers an area of 56,800 km<sup>2</sup> with an average  
133 density of 145 inhabitants per square kilometer [16]. The population was 8.08 million  
134 in 2019, of which 50.2% were women [17]. Most of the population is young (60% of  
135 Togolese are under 25 years of age), and lives in rural areas (62%) [17]. Togo's health  
136 system has a three-level pyramid structure: central, intermediate and peripheral levels.  
137 Administrative and healthcare delivery components are associated with every level.

### 138 ***2.2. Study population and sample size***

139 The target population included all HPs who received the first dose of the  
140 COVISHIELD™ vaccine during the first phase of the vaccination campaign in Togo.  
141 For the purpose of this study, a health professional was defined as a professional who  
142 works or is affiliated with the health sector, including workers from health administration  
143 and logistics, clinical settings, and community health workers. The inclusion criteria for  
144 eligible participants were: (i) being a health professional aged 18 years and older; and  
145 (ii) having received the first dose of vaccine.

146 The sample size of participants was calculated using a single proportion population  
147 formula with a 95% confidence level. In the absence of previous studies on the severity  
148 of the adverse events of the vaccine against COVID-19, we hypothesized that 10% of  
149 the participants would experience at least one severe adverse event with a 2% margin

150 error and a 10% nonresponse rate. The minimum number of participants was  
151 estimated at 960.

### 152 ***2.3. Data collection***

153 A multiple-choice questionnaire was developed using items from a questionnaire of the  
154 Pharmacovigilance Department of the Togo Ministry of Health and from previous  
155 related studies found in the literature [18,19]. The questionnaire consisted of two main  
156 sections on sociodemographic and professional characteristics (age, sex, marital  
157 status, working place) and vaccination (date, process, confidence in the vaccine  
158 efficacy, occurrence of adverse events and likelihood of getting the second dose). The  
159 self-administered questionnaire was made available using a free online platform  
160 through the internal communication networks of the Ministry of Health. The data  
161 collection process began two days after the end of the first phase of the vaccine  
162 campaign which targeted HPs in Togo.

### 163 ***2.4. Definition of the outcome variable***

164 The main outcome was the severity of reported adverse events. Adverse events were  
165 grouped into three categories: severe (presence of adverse events resulting in self-  
166 reported hospitalization, seeking medical consultation, and inability to work the day  
167 following the administration of the vaccine), moderate (presence of adverse events  
168 without hospitalization, consultation or impact on working ability), and no side effects.

### 169 ***2.5. Data management and statistical analysis***

170 Data were imported into a Microsoft Excel database for data cleaning. Descriptive  
171 statistics were performed, and the results are presented using frequency tabulations  
172 and percentages for categorical variables. Quantitative variables are presented as



173 medians with their interquartile range (IQR). Proportions were compared using Chi-  
174 square test or Fisher's exact test when appropriate. Prevalence of SAEs was estimated  
175 with its 95% confidence interval (95% CI).

176 Univariable and multivariable logistic model regression were performed to assess  
177 factors associated with SAEs. For model building, characteristics that had a p-value  
178 <0.20 in univariable analysis were considered for the full multivariable models, which  
179 were subsequently finalized using a stepwise, backward elimination approach (p-value  
180 <0.05). Predictor variables were selected as those found to be relevant according to  
181 the literature review. Sensitivity analysis was performed based on a second definition  
182 of SAEs which considered only self-reported hospitalization or seeking medical  
183 consultation. Data analysis were performed using R<sup>®</sup> version 4.0.1 software, and the  
184 level of significance was set at 5%.

## 185 ***2.6. Ethical considerations***

186 Ethical approval was obtained from the 'Comité de Bioéthique de Recherche en Santé'  
187 (Bioethics Committee for Health Research) from the Togo Ministry of Health (No.  
188 01/2021/CBRS). An introductory question was asked to ensure participants' consent.

189

## 190 **3. Results**

### 191 **3.1. Sociodemographic characteristics of health professionals**

192 A total of 1,639 HPs (70.2% male) who had received the first dose of the vaccine  
193 responded to the questionnaire. This sample represents 4.6% of the HPs vaccinated  
194 in Togo.

195 The median age [IQR] of the participants was 32 years [27-40]. Approximately half  
196 (45.8%) of the participants resided or practiced in the *Grand-Lomé* region and 54.7%  
197 were married (Table 1).

### 198 **3.2. Prevalence of adverse events**

199 Among the 1,639 participants, 1174 (71.6%, 95% CI = [69.3-73.8]) reported at least  
200 one side effect. The most commonly reported adverse events were pain at the injection  
201 site (91.0%), asthenia (74.3%), headache (68.7%), body aches (55.0%), and fever  
202 (47.5%). An increase in libido was also reported in 3.0% of the participants (Figure 1).  
203 Of the participants who experienced adverse events, 18.2% were unable to go to work  
204 the day after vaccination, 10.5% consulted a medical doctor, and 1.0% were  
205 hospitalized. Thus, the prevalence of SAEs was 23.8% (95% CI = [21.8-25.9]).

### 206 **3.3. Post vaccination treatment**

207 Overall, medication use after vaccination was higher among participants with SAEs  
208 ( $p < 0.001$ ). The use of analgesics by participants with SAE was 62.3% vs 39.0% for  
209 participants with moderate events and 5.2% for those reporting no events (Table 2).

### 210 **3.4. Perception after vaccination**

211 A total of 67.5% of survey participants expressed concern about long-term adverse  
212 events, and this concern was more pronounced among women than men (74.2% vs.  
213 64.7%,  $p < 0.001$ ). Approximately one out of ten participants (10.9%) said they were not  
214 ready to take the second dose of the vaccine (Table 3).

### 215 ***3.5. Factors associated with the occurrence of severe adverse events***

216 In univariate analysis, factors associated with the occurrence of SAEs included being  
217 under 30 years of age (OR=4.74;  $p < 0.001$ ), or 30-49 years of age (OR=3.00;  $p < 0.001$ )  
218 and being female (OR=2.07;  $p < 0.001$ ). The same factors were associated with the  
219 occurrence of SAEs in multivariate analysis (Table 4).

220 Using the second definition of SAEs, the prevalence of SAEs was estimated at 10.6%  
221 (95% CI = [9.2-12.2]); the factors associated with the occurrence of SAE were the  
222 same both in univariate and in multivariate analysis (under 30 years of age aOR=2.23;  
223  $p = 0.049$ ; 30-49 years of age, aOR=2.73,  $p = 0.016$  and being female, aOR=2.01,  
224  $p < 0.001$ ).

225

226

## 227 **4. Discussion**

228 This is the first study in Africa to report SAEs after vaccination with the COVISHIELD™  
229 vaccine in the context of COVID-19 among HPs. We included 4.6% of healthcare  
230 professionals vaccinated in Togo. SAEs were reported among 23.8% of participants in  
231 the current study. Most adverse events reported were mild or severe and compared  
232 with those reported in trials of AstraZeneca [20,21]. However, this study clearly shows  
233 that the odds of experiencing SAEs after vaccination against COVID-19 are higher in  
234 younger people and women compared to older adults and men, respectively.

235 Based on our operational definition, approximately one-quarter of participants reported  
236 SAEs. This value could be overestimated since because we included the inability to  
237 work the day after vaccination. If we consider only hospitalization and consultation of  
238 a medical doctor after vaccination, approximately 12.0% presented SAEs. In a single-  
239 blind, randomized, controlled, phase 2/3 trial (COV002), in the United Kingdom (UK),  
240 as of October 26, 2020, 13 serious adverse events occurred during the study period,  
241 but none of those were considered to be related to the study vaccine [22]. The interim  
242 analysis of the efficacy and safety of the ChAdOx1 nCoV-19 vaccine includes data  
243 from four ongoing blinded, randomized, controlled trials performed across three  
244 countries including the UK, Brazil and South Africa, and was reported in January 2021  
245 [20]. In this analysis, 175 SAEs occurred in 168 participants, of which three events  
246 were classified as possibly related to a vaccine: one in the ChAdOx1 nCoV-19 group,  
247 one in the control group, and one in a participant who remained masked to group  
248 allocation.

249 Several definitions exist to classify adverse events according to their severity. For  
250 example, in the COV002 trial, in the UK, SAEs were defined as substantial limitations  
251 in activity and medical intervention or the requirement of therapy [22].

252 We did not include, the use of medication in our definition, given that the study  
253 population was included HPs who have easy access to medication and a proven  
254 tendency to self-medicate [23,24]. Interpretations of the severity of adverse events  
255 must take into account the definition we adopted.

256 In our study, SAEs were more common in younger people than in people aged 50  
257 years and older. The younger the subject was, the more severe the adverse events  
258 tended to be. This trend has been reported by Oxford COVID Vaccine Trial Group and  
259 seems to be related to an exaggerated immune response in young subjects [22]. In  
260 other countries, severe events following the COVISHIELD™ vaccine have been  
261 observed more in subjects under 55 years of age, which has prompted France among  
262 other countries to exclusively recommend this vaccine for subjects aged 55 years and  
263 older. In Togo, such recommendation is difficult to apply given there is no other vaccine  
264 available to date.

265 Adverse events after vaccination were more pronounced in women. This observation  
266 is not unusual for vaccines in general [25] and seems to be consistent with data in the  
267 literature about COVID-19 vaccines [26,27]. More SAEs in women have been reported  
268 in other settings and appear to be related to a stronger immune response triggered by  
269 estrogen [25].

270 Most reported adverse events with the COVID-19 vaccine were mild. A sore arm was  
271 the most common, and others included headache, tiredness, and a mild flu-like  
272 symptoms [28,29]. Similar adverse events were reported in our study. However, in our

273 study, an increase in libido was unexpectedly reported by 3.0% of HPs in both men  
274 and women. Among all UK spontaneous reports received between March 4,2021 and  
275 March 14,2021 for COVID-19 Oxford University/AstraZeneca vaccine, one case of  
276 increased libido, one of decreased libido and six cases of loss of libido were mentioned  
277 [30]. This information should be investigated to demonstrate an association with  
278 vaccination.

279 Concerning the perception/intention after the first dose of vaccine, two thirds of the  
280 participants expressed concern about long-term adverse events, and one out of ten  
281 declared they were not ready to take the second dose of the vaccine. These results  
282 could be explained by several concerns about ChAdOx1 nCoV-19 which arose in  
283 Europe and some African countries and resulted in the temporarily suspension the  
284 administration of this vaccine [31].

285 This study presents some limitations. We cannot exclude selection bias due to our  
286 sampling method. Another limitation is that data collection was based on a declarative  
287 approach. However, given that the participants were HPs, the reported effects are  
288 probably consistent with reality.

289 Finally, we used an operational definition to define SAE. This is a composite variable  
290 including absence from work the day after vaccination, medical consultation and  
291 hospitalization due to adverse events. This definition probably led to an overestimation  
292 of SAE, but this operational definition seems appropriate in the Togolese context.

293 Based on these results of a high prevalence of SAEs in young people, systematic  
294 prescription of antalgics or antipyretics could be proposed to young people who are  
295 eligible to be vaccinated. Careful monitoring of SAEs should be performed in younger

296 people under 50 years of age. If another vaccine becomes available in Togo, the  
297 COVISHIELD™ vaccine should be reserved for older adults.

298 A cohort study is therefore needed for a follow-up of HPs to better document the  
299 occurrence of long-term adverse events. The results from the present study are useful  
300 for designing a sensitization program in order to reassure the general population about  
301 COVID-19 vaccination. At this stage, there is no reported sign in link with thrombosis.

## 302 5. **Conclusion**

303 In conclusion, despite the occurrence of SAEs, vaccination against COVID-19 remains  
304 an important strategy to fight against this pandemic. Current data collected in Togo are  
305 reassuring about adverse events and how they could be managed.

306

307 **Declarations:**

- 308 i. **Funding:** Not applicable
- 309 ii. **Conflicts of interest/Competing interests:** The authors declare that they have  
310 no competing interests. DEL works for the World Health Organization, Togo  
311 country office. The authors are solely responsible for the views expressed in  
312 this manuscript and do not necessarily represent the decisions, policies or views  
313 of the World Health Organization.
- 314 iii. **Availability of data and material:** Available on request to the corresponding  
315 author.
- 316 iv. **Code availability:** Not applicable
- 317 v. **Ethics approval:** This study obtained ethical approval from the 'Comité de  
318 Bioéthique de Recherche en Santé' (Bioethics Committee for Health Research)  
319 from the Togo Ministry of Health (No. 01/2021/CBRS).
- 320 vi. **Consent to participate:** informed consent was collected prior to inclusion.
- 321 vii. **Consent for publication:** Not applicable

322



323 **References**

- 324 1. Zhu N, Zhang D, Wang W, Li X, Yang B, Song J, et al. A Novel Coronavirus  
325 from Patients with Pneumonia in China, 2019. *N Engl J Med.* 2020 Feb  
326 20;382(8):727–33.
- 327 2. World Health Organization (WHO). Statement on the second meeting of the  
328 International Health Regulations (2005) Emergency Committee regarding the  
329 outbreak of novel coronavirus (2019-nCoV) [Internet]. [cited 2021 Mar 29].  
330 Available from: [https://www.who.int/news/item/30-01-2020-statement-on-the-](https://www.who.int/news/item/30-01-2020-statement-on-the-second-meeting-of-the-international-health-regulations-(2005)-emergency-committee-regarding-the-outbreak-of-novel-coronavirus-(2019-ncov))  
331 [second-meeting-of-the-international-health-regulations-\(2005\)-emergency-](https://www.who.int/news/item/30-01-2020-statement-on-the-second-meeting-of-the-international-health-regulations-(2005)-emergency-committee-regarding-the-outbreak-of-novel-coronavirus-(2019-ncov))  
332 [committee-regarding-the-outbreak-of-novel-coronavirus-\(2019-ncov\).](https://www.who.int/news/item/30-01-2020-statement-on-the-second-meeting-of-the-international-health-regulations-(2005)-emergency-committee-regarding-the-outbreak-of-novel-coronavirus-(2019-ncov))
- 333 3. World Health Organization (WHO). WHO Coronavirus (COVID-19) Dashboard  
334 [Internet]. [cited 2021 Mar 24]. Available from: <https://covid19.who.int>
- 335 4. Bruinen de Bruin Y, Lequarre A-S, McCourt J, Clevestig P, Pigazzani F, Zare  
336 Jeddi M, et al. Initial impacts of global risk mitigation measures taken during the  
337 combatting of the COVID-19 pandemic. *Saf Sci.* 2020 Aug;128:104773.
- 338 5. World Health Organization (WHO). Overview of Public Health and Social  
339 Measures in the context of COVID-19 [Internet]. [cited 2020 Jun 19]. Available  
340 from: [https://www.who.int/publications-detail-redirect/overview-of-public-health-](https://www.who.int/publications-detail-redirect/overview-of-public-health-and-social-measures-in-the-context-of-covid-19)  
341 [and-social-measures-in-the-context-of-covid-19.](https://www.who.int/publications-detail-redirect/overview-of-public-health-and-social-measures-in-the-context-of-covid-19)
- 342 6. 172 countries and multiple candidate vaccines engaged in COVID-19 vaccine  
343 Global Access Facility [Internet]. [cited 2021 Mar 24]. Available from:  
344 [https://www.who.int/news/item/24-08-2020-172-countries-and-multiple-](https://www.who.int/news/item/24-08-2020-172-countries-and-multiple-candidate-vaccines-engaged-in-covid-19-vaccine-global-access-facility)  
345 [candidate-vaccines-engaged-in-covid-19-vaccine-global-access-facility](https://www.who.int/news/item/24-08-2020-172-countries-and-multiple-candidate-vaccines-engaged-in-covid-19-vaccine-global-access-facility)
- 346 7. World Health Organization (WHO). COVID-19 vaccines [Internet]. [cited 2021  
347 Mar 24]. Available from: [https://www.who.int/emergencies/diseases/novel-](https://www.who.int/emergencies/diseases/novel-coronavirus-2019/covid-19-vaccines)  
348 [coronavirus-2019/covid-19-vaccines](https://www.who.int/emergencies/diseases/novel-coronavirus-2019/covid-19-vaccines)
- 349 8. World Health Organization (WHO). WHO issues its first emergency use  
350 validation for a COVID-19 vaccine and emphasizes need for equitable global  
351 access [Internet]. [cited 2021 Mar 26]. Available from:  
352 [https://www.who.int/news/item/31-12-2020-who-issues-its-first-emergency-use-](https://www.who.int/news/item/31-12-2020-who-issues-its-first-emergency-use-validation-for-a-covid-19-vaccine-and-emphasizes-need-for-equitable-global-access)  
353 [validation-for-a-covid-19-vaccine-and-emphasizes-need-for-equitable-global-](https://www.who.int/news/item/31-12-2020-who-issues-its-first-emergency-use-validation-for-a-covid-19-vaccine-and-emphasizes-need-for-equitable-global-access)  
354 [access](https://www.who.int/news/item/31-12-2020-who-issues-its-first-emergency-use-validation-for-a-covid-19-vaccine-and-emphasizes-need-for-equitable-global-access)
- 355 9. Global Alliance for Vaccination and Immunization (GAVI). COVAX roll-out -  
356 Togo [Internet]. [cited 2021 Mar 24]. Available from: [https://www.gavi.org/covax-](https://www.gavi.org/covax-vaccine-roll-out/togo)  
357 [vaccine-roll-out/togo](https://www.gavi.org/covax-vaccine-roll-out/togo)
- 358 10. Staff S. Covid-19: India looking at all ‘serious’ side effects amid safety concerns  
359 about AstraZeneca vaccine [Internet]. *Scroll.in.* <https://scroll.in>; [cited 2021 Mar  
360 26]. Available from: [https://scroll.in/latest/989440/covid-19-india-looking-at-all-](https://scroll.in/latest/989440/covid-19-india-looking-at-all-serious-side-effects-amid-safety-concerns-about-astrazeneca-vaccine)  
361 [serious-side-effects-amid-safety-concerns-about-astrazeneca-vaccine](https://scroll.in/latest/989440/covid-19-india-looking-at-all-serious-side-effects-amid-safety-concerns-about-astrazeneca-vaccine)

- 362 11. World Health Organization (WHO). WHO recommendation Serum Institute of  
363 India Pvt Ltd - COVID-19 Vaccine (ChAdOx1-S [recombinant]) - COVISHIELD™  
364 [Internet]. WHO - Prequalification of Medical Products (IVDs, Medicines,  
365 Vaccines and Immunization Devices, Vector Control). 2021 [cited 2021 Mar 26].  
366 Available from: [https://extranet.who.int/pqweb/vaccines/covid-19-vaccine-](https://extranet.who.int/pqweb/vaccines/covid-19-vaccine-chadox1-s-recombinant-covishield)  
367 [chadox1-s-recombinant-covishield](https://extranet.who.int/pqweb/vaccines/covid-19-vaccine-chadox1-s-recombinant-covishield)
- 368 12. COVID-19 national deployment and vaccination plan: Submission and review  
369 process, 29 January 2021 [Internet]. [cited 2021 Mar 30]. Available from:  
370 [https://www.who.int/publications-detail-redirect/WHO-2019-nCoV-NDVP-](https://www.who.int/publications-detail-redirect/WHO-2019-nCoV-NDVP-country_plans-2021.1)  
371 [country\\_plans-2021.1](https://www.who.int/publications-detail-redirect/WHO-2019-nCoV-NDVP-country_plans-2021.1)
- 372 13. République Togolaise, Ministère de la Santé, de l'Hygiène Publique et de  
373 l'Accès Universel aux Soins. Epidémie de COVID-19 au Togo-Rapport de  
374 situation N°381 au 28 mars 2021. 2021; 10p.
- 375 14. République Togolaise. COVID-19 [Internet]. COVID 19. [cited 2021 Mar 24].  
376 Available from: <https://covid19.gouv.tg/>
- 377 15. République Togolaise. Ministère de santé, de l'hygiène publique et de l'accès  
378 universel aux soins. Vaccination du personnel de santé du pays contre la  
379 COVID-19 (Bulletin d'information N°2). 2021. 4p.
- 380 16. World Bank, Data Bank. CountryProfile [Internet]. [cited 2021 Mar 26]. Available  
381 from:  
382 [https://databank.worldbank.org/views/reports/reportwidget.aspx?Report\\_Name=](https://databank.worldbank.org/views/reports/reportwidget.aspx?Report_Name=CountryProfile&Id=b450fd57&tbar=y&dd=y&inf=n&zm=n&country=TGO)  
383 [CountryProfile&Id=b450fd57&tbar=y&dd=y&inf=n&zm=n&country=TGO](https://databank.worldbank.org/views/reports/reportwidget.aspx?Report_Name=CountryProfile&Id=b450fd57&tbar=y&dd=y&inf=n&zm=n&country=TGO)
- 384 17. République Togolaise, Direction Générale de la Statistique et de la Comptabilité  
385 Nationale du Togo (DGSCN). Résultats définitifs du 4ième Recensement  
386 Général de la Population et de l'Habitat (4ième RGPH4). Lomé : DGSCN ; 2010,  
387 66p. Disponible sur : <https://inseed.tg/download/2958/>.
- 388 18. Meo SA, Bukhari IA, Akram J, Meo AS, Klonoff DC. COVID-19 vaccines:  
389 comparison of biological, pharmacological characteristics and adverse effects of  
390 Pfizer/BioNTech and Moderna Vaccines. *Eur Rev Med Pharmacol Sci*. 2021  
391 Feb;25(3):1663–9.
- 392 19. D'Alessandro D, Ciriminna S, Rossini A, Bossa MC, Fara GM. Requests of  
393 medical examinations after pneumococcal & influenza vaccination in the elderly.  
394 *Indian J Med Res*. 2004 May;119 Suppl:108–14.
- 395 20. Voysey M, Clemens SAC, Madhi SA, Weckx LY, Folegatti PM, Aley PK, et al.  
396 Safety and efficacy of the ChAdOx1 nCoV-19 vaccine (AZD1222) against  
397 SARS-CoV-2: an interim analysis of four randomised controlled trials in Brazil,  
398 South Africa, and the UK. *Lancet Lond Engl*. 2021;397(10269):99–111.
- 399 21. Torjesen I. Covid-19: First UK vaccine safety data are “reassuring,” says  
400 regulator. *BMJ*. 2021 Feb 8;372:n363.

- 401 22. Ramasamy MN, Minassian AM, Ewer KJ, Flaxman AL, Folegatti PM, Owens  
402 DR, et al. Safety and immunogenicity of ChAdOx1 nCoV-19 vaccine  
403 administered in a prime-boost regimen in young and old adults (COV002): a  
404 single-blind, randomised, controlled, phase 2/3 trial. *Lancet Lond Engl*.  
405 2021;396(10267):1979–93.
- 406 23. Ran L, Chen X, Wang Y, Wu W, Zhang L, Tan X. Risk Factors of Healthcare  
407 Workers With Coronavirus Disease 2019: A Retrospective Cohort Study in a  
408 Designated Hospital of Wuhan in China. *Clin Infect Dis Off Publ Infect Dis Soc*  
409 *Am*. 2020 Nov 19;71(16):2218–21.
- 410 24. Sadio AJ, Gbeasor-Komlanvi FA, Konu RY, Bakoubayi AW, Tchankoni MK,  
411 Bitty-Anderson AM, et al. Assessment of self-medication practices in the context  
412 of the COVID-19 outbreak in Togo. *BMC Public Health*. 2021 Jan 6;21(1):58.
- 413 25. Potluri T, Fink AL, Sylvia KE, Dhakal S, Vermillion MS, vom Steeg L, et al. Age-  
414 associated changes in the impact of sex steroids on influenza vaccine  
415 responses in males and females. *Npj Vaccines*. 2019 Jul 12;4(1):1–12.
- 416 26. Gee J. First Month of COVID-19 Vaccine Safety Monitoring — United States,  
417 December 14, 2020–January 13, 2021. *MMWR Morb Mortal Wkly Rep [Internet]*.  
418 2021 [cited 2021 Mar 26];70. Available from:  
419 <https://www.cdc.gov/mmwr/volumes/70/wr/mm7008e3.htm>
- 420 27. Blumenthal KG, Robinson LB, Camargo CA, Shenoy ES, Banerji A, Landman  
421 AB, et al. Acute Allergic Reactions to mRNA COVID-19 Vaccines. *JAMA*  
422 [Internet]. 2021 Mar 8 [cited 2021 Mar 26]; Available from:  
423 <https://jamanetwork.com/journals/jama/fullarticle/2777417>
- 424 28. World Health Organization (WHO). Coronavirus disease (COVID-19): Vaccines  
425 safety [Internet]. [cited 2021 Mar 26]. Available from: [https://www.who.int/news-](https://www.who.int/news-room/q-a-detail/coronavirus-disease-(covid-19)-vaccines-safety)  
426 [room/q-a-detail/coronavirus-disease-\(covid-19\)-vaccines-safety](https://www.who.int/news-room/q-a-detail/coronavirus-disease-(covid-19)-vaccines-safety)
- 427 29. US Centers for Diseases Control and Prevention (US CDC). What to Expect  
428 after Getting a COVID-19 Vaccine [Internet]. Centers for Disease Control and  
429 Prevention. 2021 [cited 2021 Mar 26]. Available from:  
430 <https://www.cdc.gov/coronavirus/2019-ncov/vaccines/expect/after.html>
- 431 30. Government of the United Kingdom. Assests publishing service. COVID-19  
432 vaccine AstraZeneca analysis print. 2021. [Cited 26/03/2021]. Available from:  
433 [https://assets.publishing.service.gov.uk/government/uploads/system/uploads/att](https://assets.publishing.service.gov.uk/government/uploads/system/uploads/attachment_data/file/972833/COVID-19_AstraZeneca_Vaccine_Analysis_Print.pdf)  
434 [achment\\_data/file/972833/COVID-19\\_AstraZeneca\\_Vaccine\\_Analysis\\_Print.pdf](https://assets.publishing.service.gov.uk/government/uploads/system/uploads/attachment_data/file/972833/COVID-19_AstraZeneca_Vaccine_Analysis_Print.pdf).
- 435 31. World Health Organization (WHO). WHO statement on AstraZeneca COVID-19  
436 vaccine safety signals [Internet]. [cited 2021 Mar 26]. Available from:  
437 [https://www.who.int/news/item/17-03-2021-who-statement-on-astrazeneca-](https://www.who.int/news/item/17-03-2021-who-statement-on-astrazeneca-covid-19-vaccine-safety-signals)  
438 [covid-19-vaccine-safety-signals](https://www.who.int/news/item/17-03-2021-who-statement-on-astrazeneca-covid-19-vaccine-safety-signals)

439

440

441  
442  
443

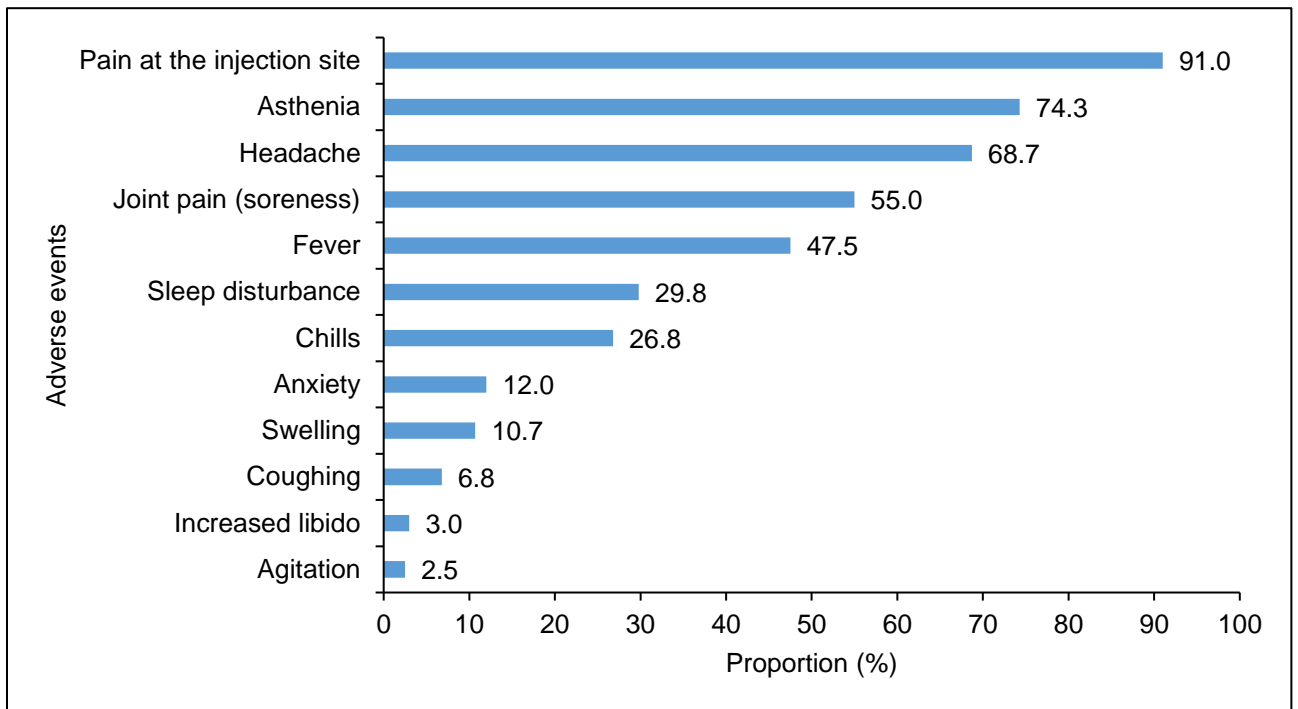

444  
445  
446  
447  
448

**Figure 1.** Proportion of adverse events among health professionals after vaccination against COVID-19, Togo, 2021 (n = 1,174)

**Table 1.** Sociodemographic characteristics of health professionals vaccinated against COVID-19 in Togo, 2021 (n = 1,639)

|                                  | <b>Frequency</b> | <b>Proportion (%)</b> |
|----------------------------------|------------------|-----------------------|
| <b>Age (years), Median (IQR)</b> |                  | 32 (27-40)            |
| <b>Age (years)</b>               |                  |                       |
| <30                              | 634              | 38.7                  |
| 30-49                            | 862              | 52.6                  |
| ≥50                              | 143              | 8.7                   |
| <b>Sex</b>                       |                  |                       |
| Female                           | 488              | 29.8                  |
| Male                             | 1151             | 70.2                  |
| <b>Health region</b>             |                  |                       |
| Grand-Lomé                       | 751              | 45.8                  |
| Maritime                         | 243              | 14.8                  |
| Plateaux                         | 161              | 9.8                   |
| Centrale                         | 104              | 6.4                   |
| Kara                             | 274              | 16.7                  |
| Savanes                          | 106              | 6.5                   |
| <b>Marital status</b>            |                  |                       |
| Single/Widowed/Divorced          | 742              | 45.3                  |
| Married                          | 897              | 54.7                  |

IQR: interquartile range

**Table 2.** Use of medication after vaccination against COVID-19 according to the severity of adverse events among health professionals, Togo, 2021

|                                   | Adverse events after COVID-19 vaccination |            |            |             | P        |
|-----------------------------------|-------------------------------------------|------------|------------|-------------|----------|
|                                   | None                                      | Moderate   | Severe     | Overall     |          |
|                                   | (n = 442)                                 | (n = 807)  | (n = 390)  | (n = 1,639) |          |
| Analgesics, n (%)                 | 23 (5.2)                                  | 315 (39.0) | 243 (62.3) | 581 (35.4)  | <0.001*  |
| Antipyretics, n (%)               | 15 (3.4)                                  | 207 (25.7) | 181 (46.4) | 403 (24.6)  | <0.001*  |
| NSAIDs <sup>§</sup> , n (%)       | 10 (2.3)                                  | 82 (10.2)  | 65 (16.7)  | 157 (9.6)   | <0.001*  |
| Antihistamines, n (%)             | 1 (0.2)                                   | 23 (2.9)   | 43 (11.0)  | 67 (4.1)    | <0.001** |
| Vitamin C, n (%)                  | 1 (0.2)                                   | 19 (2.4)   | 17 (4.4)   | 37 (2.3)    | <0.001** |
| Herbal medicines/infusions, n (%) | 0 (0.0)                                   | 12 (1.5)   | 14 (3.6)   | 26 (1.6)    | <0.001** |

<sup>§</sup>NSAIDs: non-steroidal anti-inflammatory drugs

\*Chi-squared test; \*\*Fisher test

**Table 3.** Perceptions among health professionals after vaccination against COVID-19, Togo, 2021

|                                           | <b>Female</b>    | <b>Male</b>        | <b>Overall</b>     | <b>p</b> |
|-------------------------------------------|------------------|--------------------|--------------------|----------|
|                                           | <b>(n = 488)</b> | <b>(n = 1,151)</b> | <b>(n = 1,639)</b> |          |
| <b>Afraid of long-term adverse events</b> |                  |                    |                    | <0.001*  |
| No                                        | 126 (25.8)       | 406 (35.3)         | 532 (32.5)         |          |
| Yes                                       | 362 (74.2)       | 745 (64.7)         | 1107 (67.5)        |          |
| <b>Regret to have been vaccinated</b>     |                  |                    |                    | <0.001*  |
| No                                        | 347 (71.1)       | 923 (80.2)         | 1270 (77.5)        |          |
| Yes                                       | 141 (28.9)       | 228 (19.8)         | 369 (22.5)         |          |
| <b>Ready for the second dose</b>          |                  |                    |                    | 0.004*   |
| Hesitation                                | 201 (41.2)       | 391 (34.0)         | 592 (36.1)         |          |
| No                                        | 59 (12.1)        | 119 (10.3)         | 178 (10.9)         |          |
| Yes                                       | 228 (46.7)       | 641 (55.7)         | 869 (53.0)         |          |

\*Chi-squared test

**Table 4.** Factors associated with severe adverse events after COVID-19 vaccination among health professionals in Togo, 2021

|                                      | Prevalence |      | Binary logistic model regression |           |        |               |            |        |
|--------------------------------------|------------|------|----------------------------------|-----------|--------|---------------|------------|--------|
|                                      | n          | %    | Univariable                      |           |        | Multivariable |            |        |
|                                      |            |      | OR                               | 95%CI     | p      | aOR           | 95%CI      | p      |
| <b>Age (years)</b>                   |            |      |                                  |           |        |               |            |        |
| <30                                  | 192        | 30.3 | 4.74                             | 2.67-9.22 | <0.001 | 5.54          | 2.95-11.42 | <0.001 |
| 30-49                                | 186        | 21.6 | 3.00                             | 1.69-5.83 | <0.001 | 3.62          | 1.94-7.41  | <0.001 |
| ≥50                                  | 12         | 8.4  | 1.00                             | -         | -      | 1.00          | -          | -      |
| <b>Sex</b>                           |            |      |                                  |           |        |               |            |        |
| Female                               | 164        | 33.6 | 2.07                             | 1.63-2.63 | <0.001 | 1.97          | 1.53-2.54  | <0.001 |
| Male                                 | 226        | 19.6 | 1.00                             | -         | -      | 1.00          | -          | -      |
| <b>Having comorbidities</b>          |            |      |                                  |           |        |               |            |        |
| Yes                                  | 55         | 21.9 | 0.88                             | 0.63-1.21 | 0.447  | 1.12          | 0.70-1.73  | 0.628  |
| No                                   | 335        | 24.1 | 1.00                             | -         | -      | 1.00          | -          | -      |
| <b>History of COVID-19 infection</b> |            |      |                                  |           |        |               |            |        |
| No                                   | 339        | 23.6 | 1.07                             | 0.64-1.88 | 0.815  | 0.98          | 0.57-1.75  | 0.934  |
| No answer                            | 9          | 36.0 | 1.94                             | 0.72-5.08 | 0.182  | 1.90          | 0.69-5.08  | 0.206  |
| Yes                                  | 18         | 22.5 | 1.00                             | -         | -      | 1.00          | -          | -      |

OR: Odds ratio; aOR: adjusted Odds ratio; 95%CI: 95% confidence interval
